# Supplementary figures and images for: Nitric oxide-containing supramolecular polypeptide nanomedicine based on [2]biphenyl-extended-pillar[6]arenes for drug resistance reversal
Source: Royal Society of Chemistry journal article supplement (doi:10.1039/d2tb01127a), 2022-01-01

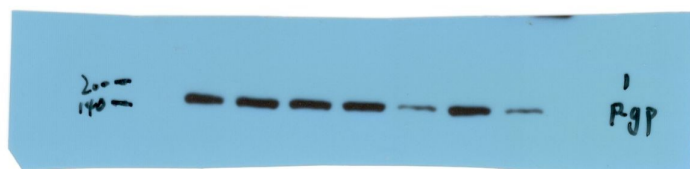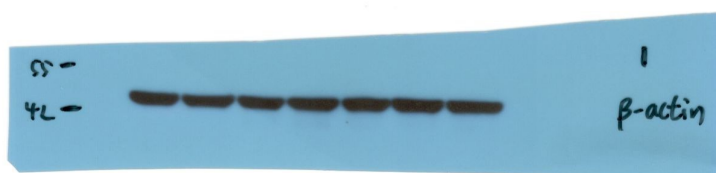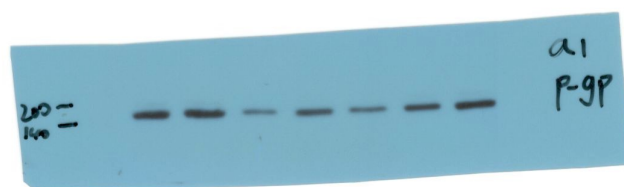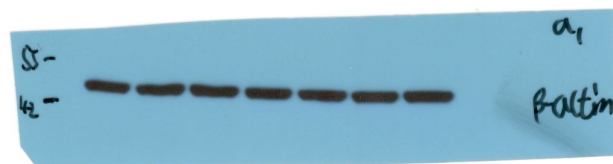

Supplement: d2tb01127a2.pdf [file d2tb01127a2.pdf]
